# Supplementary material for: A Systematic Review of User Acceptance in Industrial Augmented Reality
Source: Frontiers journal article supplement (doi:10.3389/feduc.2021.700760), 2021-12-20
Supplement: Table_2.pdf [file Table_2.pdf]

1 **Table S2 Details on methods and variables of user studies**

| <b>Paper</b>          | <b>Methods applied</b> | <b>No. participants</b> | <b>Applied User acceptance models</b> | <b>Dependent variables related to user acceptance</b> | <b>Other factors studied</b>                                                                                     |
|-----------------------|------------------------|-------------------------|---------------------------------------|-------------------------------------------------------|------------------------------------------------------------------------------------------------------------------|
| Alves et al., 2019    | POTQ                   | 15                      | -                                     | PEOU                                                  | TCT, ER, WL                                                                                                      |
| Arntz et al., 2020    | PRTQ, POTQ             | 52                      | -                                     | PEOU                                                  | Flow, immersion, USB, objective measurement                                                                      |
| Aromaa et al., 2016   | POTQ                   | 4                       | TAM                                   | PEOU                                                  | USB, UE                                                                                                          |
| Aromaa et al., 2018a  | POTQ, OS, IV           | 10                      | TAM                                   | PEOU, PU                                              | UE                                                                                                               |
| Aromaa et al., 2018b  | POTQ                   | 7                       | TAM                                   | PEOU, PU                                              | Ergonomics, UE                                                                                                   |
| Beckmann et al., 2019 | POTQ                   | 58                      | TAM                                   | PEOU, PU, ATU, HM, BI, EJM                            | USB, presence, learning experience                                                                               |
| Bosch et al., 2020    | POTQ                   | 76                      | TAM                                   | -                                                     | TCT, speed of learning, ER, supervisory guidance efforts, employability, WR, perceived effort, USB               |
| Catal et al., 2019    | POTQ                   | 36                      | TAM, TAM 2                            | PEOU, PU                                              | TCT                                                                                                              |
| Daling et al., 2020   | PRTQ, POTQ             | 24                      | TAM 3                                 | PEOU, PU, MSE, EJM                                    | affinity for technology, locus of control for technology, WL, aesthetic and layout, appropriateness of functions |
| Elshafey et al., 2020 | SV                     | 58                      | TAM 3                                 | PEOU, PU, EJM, IMG, CAX, JR, VT, BI, RD, PEC          | -                                                                                                                |
| Helin et al., 2018    | POTQ, IV               | 53                      | -                                     | -                                                     | UE, USB, subjective satisfaction                                                                                 |
| Jetter et al., 2018   | PRTQ, POTQ             | 51                      | TAM                                   | PEOU, PU, ATU, BI                                     | WL, spatial representation, TCT, ER                                                                              |
| Kim and Lee, 2016     | POTQ                   | 20                      |                                       | PEOU, PU                                              | TCT, ER, UE                                                                                                      |
| Lee et al., 2020      | POTQ                   | 46                      | TAM, UTAUT                            | PEOU, PU, US, BI                                      | quality of visual presentation, physical comfort, mental comfort, UE                                             |
| Loch et al., 2016     | POTQ                   | 17                      | TAM 3                                 | PEOU, PEC, EJM                                        | TCT, ER, WL                                                                                                      |

|                          |          |    |                           |                                                             |                                                         |
|--------------------------|----------|----|---------------------------|-------------------------------------------------------------|---------------------------------------------------------|
| Masood and Egger, 2019   | Survey   | 84 | -                         | -                                                           | TOE (technology, organisation, and environment model)   |
| Masood and Egger, 2020   | POTQ, IV | 22 | -                         | -                                                           | TCT, WL                                                 |
| Min et al., 2020         | POTQ     | 30 | UTAUT                     | PE, EE, ATU, BI                                             | TCT, ER, USB                                            |
| Minow et al., 2020       | POTQ     | 25 | TAM                       | PEOU, PU                                                    | experienced effort, USB                                 |
| Murauer, 2019            | IV       | 14 | DIT                       | -                                                           | -                                                       |
| Park et al., 2020        | POTQ     | 45 | -                         | -                                                           | TCT, USB, WL                                            |
| Rapaccini et al., 2014   | IV, SV   | 69 | TAM, TAM 2, TAM 3, UTAUT  | PEOU, PU, BI                                                | -                                                       |
| Scott et al., 2020       | IV       | 11 | UTAUT                     | -                                                           | Readiness for technology adoption, barriers to adoption |
| Serras et al., 2020      | POTQ     | 20 | -                         | PEOU                                                        | USB                                                     |
| Stigall and Sharma, 2019 | POTQ     | 69 | TAM                       | PEOU, PU                                                    | USB                                                     |
| Terhoeven et al., 2018   | POTQ     | 59 | TAM                       | PEOU, PU                                                    | USB                                                     |
| Werrlich et al., 2017    | POTQ     | 10 | -                         | -                                                           | requirements definition                                 |
| Wild et al., 2017        | WS, POTQ | 48 | UTAUT, TAM3, UTAUT 2, TPB | PE, EE, SI, FC, ATU, HM, HT, SN, IMG, CSE, BI, IOP, LRN, UF | UE                                                      |

Pre-test questionnaire (PRTQ), Post-test questionnaire (POTQ), Interview (IV) Survey (SV), Observation (OV), Workshop (WS)

Technology Acceptance Model (TAM), Unified Theory of Acceptance and Use of Technology (UTAUT), Theory of Planned Behaviour (TPB), Diffusion of Innovation Theory (DIT)

Perceived Ease of Use (PEOU), Perceived Usefulness (PU), Performance Expectancy (PE), Effort Expectancy (EE), Social Influence (SI), Facilitating Conditions (FC), Attitude Towards Use (ATU), Hedonic Motivation (HM), Habit (HT), Subjective Norm (SN), Image (IMG), Computer Self-Efficacy (CSE), Behavioral Intention (BI), Interoperability (IOP), Social Influence (SI), Learning (LRN), Usage Frequency (UF), Perceived External Control (PEC), Perceived Enjoyment (EJM), User Satisfaction (US), Computer Anxiety (CAX), Job Relevance (JR), Voluntariness (VT), Result Demonstrability (RD), Media Self-Efficacy (MSE)

Task completion time (TCT), Error rate (ER), Usability (USB), User Experience (UE), Workload (WL)
